# Supplementary material for: Acid–base properties of the nucleic-acid model 2′-deoxyguanylyl(5′→3′)-2′-deoxy-5′-guanylate, d(pGpG)3–, and of related guanine derivatives
Source: Royal Society of Chemistry journal article supplement (doi:10.1039/b517904a), 2006-01-01
Supplement: b517904a.pdf [file b517904a.pdf]

## Supplementary Information (ESI)

for

### **Acid-base properties of the nucleic-acid model 2'-deoxyguanylyl(5'→3')-2'-deoxy-5'-guanylate, d(pGpG)<sup>3-</sup>, and of related guanine derivatives**

**Bernd Knobloch,<sup>a,b</sup> Helmut Sigel,<sup>b</sup> Andrzej Okruszek,<sup>c</sup>  
and Roland K. O. Sigel\*<sup>a</sup>**

<sup>a</sup> *Institute of Inorganic Chemistry, University of Zürich, Winterthurerstrasse 190,  
CH-8057 Zürich, Switzerland. E-mail: Roland.Sigel@aci.unizh.ch*

<sup>b</sup> *Department of Chemistry, Inorganic Chemistry, University of Basel, Spitalstrasse 51,  
CH-4056 Basel, Switzerland*

<sup>c</sup> *Department of Bioorganic Chemistry, Center for Molecular & Macromolecular Studies,  
Polish Academy of Sciences, PL-90-363 Łódź, Poland, and Institute of Technical  
Biochemistry, Faculty of Biotechnology & Food Sciences, Technical University of Łódź,  
PL-90-924 Łódź, Poland*

The following section numbers refer to those of the main paper; in this way it is made clear to which section the Supporting Information belongs. The reference numbers are those of the main paper; further references are numbered as 1S and 2S.

## 2S Results

The release of the first proton of the 5'-P(O)(OH)<sub>2</sub> group of H<sub>4</sub>[d(pGpG)]<sup>+</sup> [eqn. (2)] could not be measured, but there are three ways to obtain an estimate based on the results listed in Table 1: (i) The acidity difference for the release of the final H<sup>+</sup> from the phosphate group in H[d(pGpG)]<sup>2-</sup> [eqn. (5)] and H(dGMP)<sup>-</sup> amounts to  $\Delta pK_a = 0.27 \pm 0.03$  [= (6.56 ± 0.03) – (6.29 ± 0.01); Table 1, entries 5 and 9]; because experience shows<sup>1S,33a</sup> that the same difference also holds for the release of the primary phosphate proton, a value for H<sub>4</sub>[d(pGpG)]<sup>+</sup> can be estimated based on the data for H<sub>3</sub>(dGMP)<sup>+</sup>, that is,  $pK_{H_4[d(pGpG)]}^H = pK_{H_3(dGMP)}^H + \Delta pK_a = (0.35 \pm 0.2) + (0.27 \pm 0.03) = 0.62 \pm 0.20$ . (ii) If one adds the difference (0.3 ± 0.4) between the pK<sub>a</sub> values of H<sub>2</sub>(pUpU)<sup>-</sup> (1.0 ± 0.3; Table 1, entry 6) and H<sub>2</sub>(UMP) (0.7 ± 0.3; Table 1, entry 7) to the value of H<sub>3</sub>(dGMP)<sup>+</sup> (0.35 ± 0.2; Table 1, entry 9), one obtains for  $pK_{H_4[d(pGpG)]}^H = (0.35 \pm 0.2) + (0.3 \pm 0.4) = 0.65 \pm 0.45$ . (iii) By subtracting the difference between the pK<sub>a</sub> values of H<sub>2</sub>(UMP) (0.7 ± 0.3; Table 1, entry 7) and H<sub>3</sub>(dGMP)<sup>+</sup> (0.35 ± 0.2; Table 1, entry 9), which gives  $\Delta pK_a' = 0.35 \pm 0.36$ , from the value for H<sub>2</sub>(pUpU)<sup>-</sup> (Table 1, entry 6), one obtains  $pK_{H_4[d(pGpG)]}^H = pK_{H_2(pUpU)}^H - \Delta pK_a' = (1.0 \pm 0.3) - (0.35 \pm 0.36) = 0.65 \pm 0.47$ . From these values we conclude that  $pK_{H_4[d(pGpG)]}^H = 0.65 \pm 0.3$  and this estimate is listed in entry 5 of Table 1 (column 3).

That this estimated acidity constant is of a reasonable order, is confirmed by a different reasoning based on different data: It has recently been shown<sup>2S</sup> for several adenine-nucleotide analogues that  $pK_{P(O)(OH)_2}^H = pK_{P(O)_2(OH)}^H - (5.68 \pm 0.05)$  [the corresponding difference for H<sub>3</sub>(AMP)<sup>+</sup> also fits into this picture].<sup>2S</sup> Application of this result to guanine derivatives is possible if the distance effect between (N1)H<sup>+</sup> and (N7)H<sup>+</sup> is taken into account; evidently in the *anti* conformation the charge at (N7)H<sup>+</sup> of H<sub>3</sub>(GMP)<sup>+</sup> is somewhat closer to the P(O)(OH)<sub>2</sub> group than that at (N1)H<sup>+</sup> in H<sub>3</sub>(AMP)<sup>+</sup>; this distance effect amounts to 0.14 ± 0.07 log units.<sup>23</sup> Hence, for the acidity constant of H<sub>4</sub>[d(pGpG)]<sup>+</sup> one obtains  $pK_{H_4[d(pGpG)]}^H = pK_{H[d(pGpG)]}^H - (5.68 \pm 0.05) - (0.14 \pm 0.07) = (6.56 \pm 0.03) - (5.68 \pm 0.05) - (0.14 \pm 0.07) = 0.74 \pm 0.09$ . This value is within the error limits identical with the one estimated above and given in Table 1.

### 3S Discussion

Regarding the validity of the estimated value of  $2.4 \pm 0.2$  for  $pK_{H_3[d(pGpG)]}^H$  (Table 1; entry 5; column 4) it may be noted that the *average*  $pK_a$  value [ $2.69 = 0.5 \times (2.4 + 2.98)$ ] excellently agrees with the expected charge effect of singly negatively charged phosphate groups, as it amounts to  $0.39 (= 2.69 - pK_{H(dGuo)}^H = 2.69 - 2.30)$   $pK$  units. The *expected* charge effect follows from the comparison of  $pK_{H_2(GMP)}^H - pK_{H(Guo)}^H = (2.48 \pm 0.04) - (2.11 \pm 0.04) = 0.37 \pm 0.06$  (Table 1; entries 1,8; column 4) and  $pK_{H_2(dGMP)}^H - pK_{H(dGuo)}^H = (2.69 \pm 0.03) - (2.30 \pm 0.04) = 0.39 \pm 0.05$ . The average of these expected effects, i.e.,  $0.38 \pm 0.06$   $pK$  units, is evidently in perfect agreement with the above value, supporting thus the estimation made in the text in Section 3.

The acidity constants for  $H_4(pGpG)^+$  given in entry 12 of Table 1 have been estimated as follows: (i) The  $pK_a$  value for  $H_4[d(pGpG)]^+$  was reduced for the effect of the 2'-OH group (see text in Section 3) to give  $pK_{H_4(pGpG)}^H = (0.65 \pm 0.3) - (0.05 \pm 0.02) = 0.6 \pm 0.3$ . (ii) The effect of the 2'-OH group on the acidity of the (N7)H<sup>+</sup> site amounts to  $\Delta pK_a = 0.20 \pm 0.06$  (average of entries 1,2 and 8,9 in column 4 of Table 1); hence, one obtains  $pK_{H_3(pGpG)}^H = pK_{H_3[d(pGpG)]}^H - \Delta pK_a = (2.4 \pm 0.2) - (0.20 \pm 0.06) = 2.2 \pm 0.2$  and for  $pK_{H_2(pGpG)}^H$ , due to the second (N7)H<sup>+</sup> site, follows [ $2.98$  (or  $2.4 + 0.6 = 3.0$ )  $\pm 0.13$ ]  $- (0.20 \pm 0.06) = 2.80 \pm (0.14 + 0.02) = 2.80 \pm 0.16$  by also considering the statistical effect of 0.6 (and adding to the error limit  $0.02 = 0.60 - 0.58$ ). (iii) In the third paragraph of Section 3 we have seen that the effect of the 2'-OH group on the  $P(O)_2(OH)^-$  residue amounts to  $0.04 \pm 0.02$   $pK$  units, hence,  $pK_{H(pGpG)}^H = pK_{H[d(pGpG)]}^H - (0.04 \pm 0.02) = (6.56 \pm 0.03) - (0.04 \pm 0.02) = 6.52 \pm 0.04$ . (iv) Similarly, the effect of the 2'-OH group on the deprotonation of the (N1)H sites amounts to  $0.04 \pm 0.05$  ( $3\sigma$ )  $pK$  units which gives  $pK_{pGpG}^H = (9.54 \pm 0.08) - (0.04 \pm 0.05) = 9.50 \pm 0.09$  and  $pK_{(pGpG-H)}^H = [10.11$  (or  $9.54 + 0.6 = 10.14$ )  $\pm 0.14] - (0.04 \pm 0.05) = 10.10 \pm (0.15 + 0.03) = 10.10 \pm 0.18$  (see (ii) for the explanation).

1S A. Fernández-Botello, R. Griesser, A. Holý, V. Moreno and H. Sigel, *Polyhedron*, 2003, **22**, 1067-1076.

2S A. Fernández-Botello, R. Griesser, A. Holý, V. Moreno and H. Sigel, *Inorg. Chem.*, 2005, **44**, 5104-5117.
